# Supplementary material
Source: publisher figshare collection journal article supplement (https://tandf.figshare.com/ndownloader/files/14690132)
Supplement: Supplementary file 1 [file 14690132]

## **Supplemental Information**

### **Economics-Oriented Discourse Strategies in Environmental Advocacy**

*Emily Matthews Luxon  
eoluxon [at] umich [dot] edu*

#### **Discourse Terms:**

*The following are the terms and phrases for the six categories of discourse used to distinguish between economics-oriented discourse strategies.*

#### **Market-Economic Discourse:**

amenity value, backstop resource, backstop technology, benefit transfer, biodiversity banking, biodiversity bond, biodiversity bonds, biodiversity investment, biodiversity investments, biodiversity offset, biodiversity offsets, biodiversity offsetting, biodiversity valuation, biological resource, biological resources, carbon budget, carbon budgeting, carbon dividend, carbon dividends, carbon market, carbon markets, carbon offset, carbon offsets, carbon offsetting, commercial value, conservation portfolio, conservation portfolios, consumptive value, contingent ranking, contingent valuation, contributory value, debt-for-nature swap, debt-for-nature swaps, deficit forest, direct use value, direct-use value, double benefits, double dividend, ecobudget, ecological asset, ecological assets, ecological benefits, ecological budget, ecological budgeting, ecological capital, ecological capitals, ecological resource, ecological resources, ecological service, ecological services, economic valuation, ecoservices, ecosystem benefits, ecosystem goods, ecosystem market, ecosystem markets, ecosystem service, ecosystem services, ecosystem valuation, ecosystems service, ecosystems services, ecotechnological productivity, emission banking, emission credit, emission credits, emission permit, emission permits, emission reduction credit, emission trading, emissions banking, emissions credit, emissions credits, emissions permit, emissions permits, emissions reduction credit, emissions trading, energy budget, environmental amenities, environmental amenity, environmental asset, environmental assets, environmental benefits, environmental bond, environmental bonds, environmental capital, environmental capitals, environmental evaluation, environmental service, environmental services, environmental value, existence value, extractive use value, extrinsic value, financial valuation, free good, genetic resource, genetic resources, habitat banking, habitat offset, habitat offsets, habitat offsetting, habitats offset, habitats offsets, habitats offsetting, hedonic pricing, indirect use value, instrumental value, market approach, market based, market making, market oriented, market-based, market-making, market-oriented, monetary valuation, monetary valuations, mother nature's bank, natural asset, natural assets, natural capital, natural capitals, natural subsidy, natural wealth, nature's services, open access, open-access, overvaluation, private good, private goods, private rights, species offset, species offsets, surplus forest, tragedy of the commons, undervaluation, use value, use-value, valuation, value capture, wetland banking, wetland banks, wetland credits, wetland mitigation banking

### Public-Economic Discourse:

a common good, appropriate distribution, circular economies, circular economy, circular flow economies, circular flow economy, circular-flow economies, circular-flow economy, club good, club goods, collective good, collective goods, collective property, common goods, common pool, common property, common-pool, common-property, commons, commons centered, commons centred, commons-centered, commons-centred, community-based natural resource management, crown land, crown lands, ecological commons, environmental equity, equitable deliberative management, global commons, intergenerational equity, intrinsic value, just compensation, natural capital debt, natural commons, natural-capital debt, non-consumptive benefits, non-consumptive use, non-consumptive value, non-market valuation, non-market value, non-use benefits, non-use value, polluter pays, polluter-pays, public good, public goods, public land, public lands, public ownership, steady state economies, steady state economy, steady-state economies, steady-state economy, sustainable development, the commons

### Critical-Economic Discourse:

asset stripping, capital accumulation, carbon debt, carbon debts, climate debt, climate debts, commodification, commodifying, commoditisation, commoditization, corporate imperialism, dispossession, ecological debt, ecological debts, enclosure, enclosures, energy speculation, environmental debt, environmental debts, extinction debt, extinction debts, fictitious commodities, financial speculation, financialisation, financialization, food speculation, green grab, green grabbing, green grabs, land grab, land grabbing, land grabs, make-believe market, make-believe markets, market environmentalism, market environmentalists, marketisation, marketization, monetisation, monetization, natural capitalism, neoliberal, neoliberal governance, neoliberalisation, neoliberalism, neoliberalization, neoliberalizing nature, privatisation, privatising, privatization, privatizing, profit maximization, profit seeking, profit-seeking, resource extractivism, water speculation

### Socio-Ecological Discourse:

agro-ecology, agroecology, bioethic, bioethical, bioethics, bioregionalism, bioregionalisms, butterfly effect, climate injustice, climate injustices, climate justice, collective responsibilities, collective responsibility, collective rights, common responsibilities, common responsibility, communal rights, community energy, community rights, culturing sustainabilities, deep ecologist, deep ecology, deliberative democracies, deliberative democracy, differentiated responsibilities, differentiated responsibility, earth democracies, earth democracy, earth jurisprudence, ecocentric democracies, ecocentric democracy, ecodeмокracies, ecodeмокracy, ecodeмокratic, ecological citizenship, ecological community, ecological consciousness, ecological democracy, ecological injustice, ecological injustices, ecological integrity, ecological justice, ecological solidarity, economic injustice, economic injustices, economic justice, ecosphere, ecosystem approach, energy injustice, energy justice, energy sovereignty,

environmental injustice, environmental injustices, environmental justice, environmental stewardship, food injustice, food justice, food sovereignty, gaia, gaia hypothesis, global justice, global village, indigenous rights, just sustainabilities, livelihood practices, mother earth, native rights, shallow ecologist, shallow ecology, social injustice, social injustices, social justice, spaceship earth, sustainability transformation, sustainability transformations, sustainability transition, sustainability transitions, sustainable futures, sustainable transformation, sustainable transformations, sustainable transition, sustainable transitions, the common good, transition town, transition towns, water injustice, water justice, water sovereignty

#### Conservation-Ecology Discourse:

biodiversity conservation, biodiversity hot spot, biodiversity hot spots, biodiversity hotspot, biodiversity hotspots, biodiversity level, biodiversity levels, biogeography, biological diversity, biological inertia, biological legacies, biological legacy, biotic resistance, conservation management, ecological diversity, ecological heritage, ecological threshold, ecological thresholds, ecological trap, ecological traps, ecosystem conservation, ecosystem function, ecosystem functions, ecosystem health, ecosystems functioning, ecosystems functions, energy conservation, environmental conservation, environmental noise, food chain, food chains, food web, food webs, nature conservation, net biodiversity, plant diversity, species richness, trophic cascade, trophic cascades, wildlife conservation, wildlife diversity

#### Green Discourse:

green accounting, green bond, green bonds, green business, green businesses, green economies, green economy, green entrepreneurial state, green entrepreneurial states, green gdp, green growth, green infrastructure, green investment, green investments, green market, green markets, green state, green states, green tax, green taxation, green taxes

#### Sources:

*The following sources were used to identify the terms across the six categories. For detailed information about which source(s) used which specific term(s), please contact the author.*

Admiraal, J.F., Musters, C.J.M. & de Snoo, G.R. (2016). The loss of biodiversity conservation in EU research programmes. *Journal for Nature Conservation* 30: 12-18.

Barnaud, C., & Antona, M. (2014). Deconstructing ecosystem services: Uncertainties and controversies around a socially-constructed concept. *Geoforum* 56: 113-123.

Bekessy, S.A., Runge, M.C, Kusmanoff, A.M., Keith, D.A., & Wintle, B.A. (2018). Ask not what nature can do for you: A critique of ecosystem services as a communication strategy. *Biological Conservation* 224: 71-74.

- Boehnert, J. (2016). The Green Economy: Reconceptualizing the Natural Commons as Natural Capital. *Environmental Communication* 10(4): 395-417.
- Brown, S.A., Tipper, W.A., & Wheeler, N. (2016). *Natural partners: Why nature conservation and natural capital approaches should work together*. Green Alliance. [http://www.green-alliance.org.uk/resources/Natural\\_partners.pdf](http://www.green-alliance.org.uk/resources/Natural_partners.pdf) (Accessed Jun 21, 2018).
- Brulle, R.J. (2000). *Agency, Democracy, and Nature*. Cambridge, MA: MIT Press.
- Coffey, B. (2016). Unpacking the politics of natural capital and economic metaphors in environmental policy discourse. *Environmental Politics* 25(2): 203-222.
- Corbera, E. (2012). Problematizing REDD+ as an experiment in payments for ecosystem services. *Current Opinion in Environmental Sustainability* 4: 612-619.
- Corbera, E. (2015). Valuing nature, paying for ecosystem services and realizing social justice: A response to Matulis (2014). *Ecological Economics* 110: 154-157.
- DiCaglio, J., Barlow, K.M., & Johnson, J.S. (2018). Rhetorical Recommendations Built on Ecological Experience. *Environmental Communication* 12(4): 438-450.
- Doak, D.F., Bakker, V.J., Goldstein, B.E., & Hale, B. (2014). What is the future of conservation? *Trends in Ecology & Evolution* 29(2): 77-81.
- Dryzek, J.S. (1997). *The Politics of the Earth: Environmental Discourses*. Oxford: Oxford University Press.
- Ertör, I., & Ortega-Cerdà, M. (2017). Unpacking the objectives and assumptions underpinning European Aquaculture. *Environmental Politics* 26(5): 893-914.
- Fisher, J.A., & Brown, K. (2014). Ecosystem services concepts and approaches in conservation: Just a rhetorical tool? *Ecological Economics* 108: 257-265.
- Global Justice Now. (2012). The great nature sale. <http://www.globaljustice.org.uk/resources/great-nature-sale> (Accessed Jun 21, 2018).
- Grafton, R.Q., Pendleton, L.H., & Nelson, H.W. (2001). *A Dictionary of Environmental Economics, Science, and Policy*. Cheltenham: Edward Elgar.
- Gray, J., & Curry, P. (2016). Ecodemocracy: helping wildlife's right to survive. *ECOS* 37(1): 18-27.
- Gunster, S., Fleet, D., Paterson, M., & Saurette, P. (2018). Climate hypocrisies: A Comparative Study of News Discourse. *Environmental Communication* 12(6): 773-793.
- Kendall, B.E. (2008). Personae and Natural Capitalism. *Environmental Communication* 2(1): 59-77.

- Larson, B. (2011). *Metaphors for Environmental Sustainability*. New Haven: Yale University Press.
- Matulis, B.S. (2014). The economic valuation of nature: A question of justice? *Ecological Economics* 104: 155-157.
- McCauley, D. (2006). Selling out on nature. *Nature* 443(7): 27-28.
- Norgaard, R.B. (2010). Ecosystem services: From eye-opening metaphor to complexity blinder. *Ecological Economics* 69: 1219-1227.
- Porritt, J. (2005). *Capitalism as if the World Matters*. London: Earthscan.
- Scasta, J.D., Welter, K.J., & Friday, C. (2018). Common Values and Themes for Grazed Open Spaces. *Environmental Communication*. DOI: 10.1080/17524032.2018.1457066
- Scoones, I. (2016). The politics of sustainability and development. *Annual Review of Environment and Resources* 41: 293–319.
- Silvertown, J. (2015). Have Ecosystem Services been oversold? *Trends in Ecology & Evolution* 30(11): 641-648.
- Silvertown, J. (2016). Ecologists Need to be Cautious about Economic Metaphors: A Reply. *Trends in Ecology & Evolution*, 31(5): 336.
- Spash, C.L., & Aslaksen, I. (2015). Re-establishing an ecological discourse in the policy debate over how to value ecosystems and biodiversity. *Journal of Environmental Management* 159: 245-253.
- Sullivan, S. (2017). On ‘Natural Capital, ‘Fairy Tales’ and Ideology. *Development and Change* 48(2): 397-423.
- TEEB. (2008) The Economics of Ecosystems and Biodiversity: An Interim Report. <http://www.teebweb.org/publication/the-economics-of-ecosystems-and-biodiversity-an-interim-report/> (Accessed Jun 21, 2018).
- TEEB. (2010) The Economics of Ecosystems and Biodiversity: Mainstreaming the Economics of Nature: A synthesis of the approach, conclusions and recommendations of TEEB. <http://www.teebweb.org/publication/mainstreaming-the-economics-of-nature-a-synthesis-of-the-approach-conclusions-and-recommendations-of-teeb/> (Accessed Jun 21, 2018).
- World Development Movement. (2012). Rio +20 summit: Whose green economy. <http://www.globaljustice.org.uk/sites/default/files/files/resources/rio20-green-economy-briefing.pdf> (Accessed Jun 21, 2018)
- World Development Movement. (2013). World Forum on Natural Capital: The great nature sale. [http://www.globaljustice.org.uk/sites/default/files/files/resources/nature\\_sale\\_briefing\\_0.pdf](http://www.globaljustice.org.uk/sites/default/files/files/resources/nature_sale_briefing_0.pdf) (Accessed Jun 21, 2018).
